# Supplementary material for: Cx47 fine-tunes the handling of serum lipids but is dispensable for lymphatic vascular function
Source: PubMed Central journal article supplement (PMC5521787; doi:10.1371/journal.pone.0181476), 2017-07-21
Supplement: pone.0181476.s001.pdf [file pone.0181476.s001.pdf]

**Supplemental Table 1: Primers used for qPCR analysis**

| <b>Gene</b>  | <b>Species</b> | <b>Forward primer</b>                 | <b>Reverse primer</b>           |
|--------------|----------------|---------------------------------------|---------------------------------|
| <i>18S</i>   | Human/mouse    | 5'-AGGAATTCCCAGTAAGTGCG               | 5'-GCCTCACTAAACCATCCAA          |
| <i>Gjc2</i>  | Mouse          | 5'-TCCACAATCATTCCACCTTCG              | 5'-CAGAAGCGCACATGAGACA          |
| <i>Prox1</i> | Mouse          | 5'-AAGATATGTCCGACATCTCACC<br>TTATTCAG | 5'-CACGTCCGAGAAGTAGGTC<br>TTCAG |
| <i>Flt1</i>  | Mouse          | 5'-TGGCTCTACGACCTTAGACTG              | 5'-CAGGTTTGACTTGTCTGAG<br>GTT   |
